# Supplementary material for: Simulated Microgravity Promotes Horizontal Gene Transfer of Antimicrobial Resistance Genes between Bacterial Genera in the Absence of Antibiotic Selective Pressure
Source: MDPI journal article supplement (doi:10.3390/life11090960), 2021-09-13

### Supplementary figure captions

**Figure S1.** Representative gel images of PCR analysis when co-cultures were grown in simulated microgravity (SMG) or normal gravity (1G). Strong bands were visualized for both (A) *bla*<sub>OXA-500</sub> and (B) *ISAbal* amplification in *S. aureus* isolates when co-cultured with the donor under SMG. This was in contrast to the absence of bands when grown under 1G. “Ap” indicates the positive control which is DNA extracted from *A. pittii* parental strain. The no template PCR control (NTC) and DNA extraction negative control had no bands on the gels.

**Figure S2.** Colony forming units of strains grown in SMG or 1G. The graph shows the counts of *S. aureus* grown on MSA after growth in SMG or 1G, either on its own or in a co-culture with *A. pittii*. There were no differences in growth regardless of single or co-culture growth or under the different growth conditions. The same analyses were performed for *A. pittii* but the data is not shown.

**Figure S3.** Schematic of where the designed primers (A) *bla*<sub>OXA-500</sub> and (B) *ISAbal* are located in the *A. pittii* genome and the sequence of the PCR products.

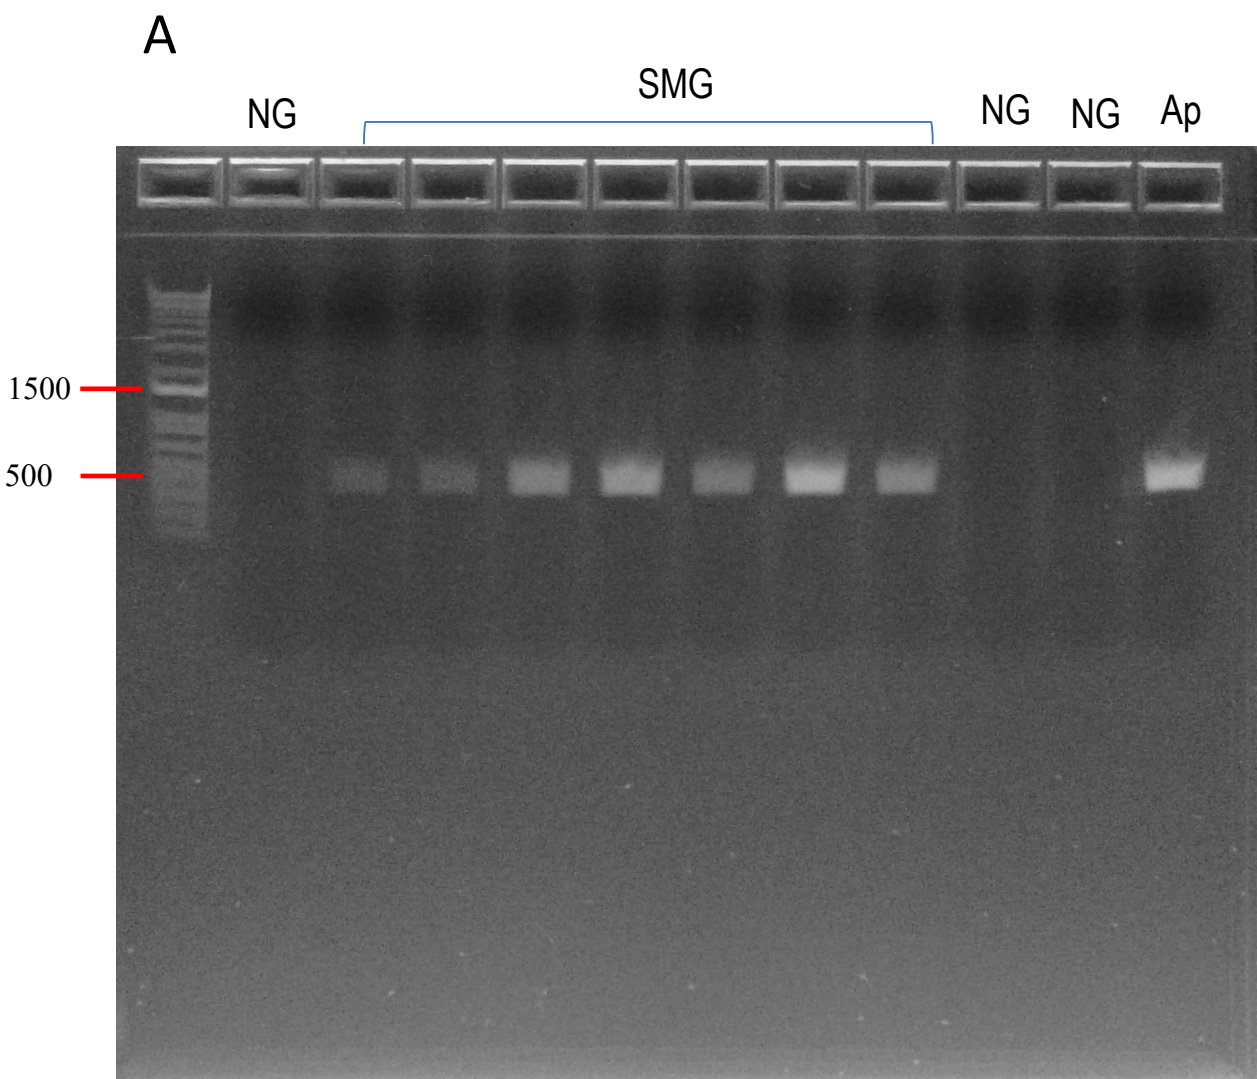

blaOXA500

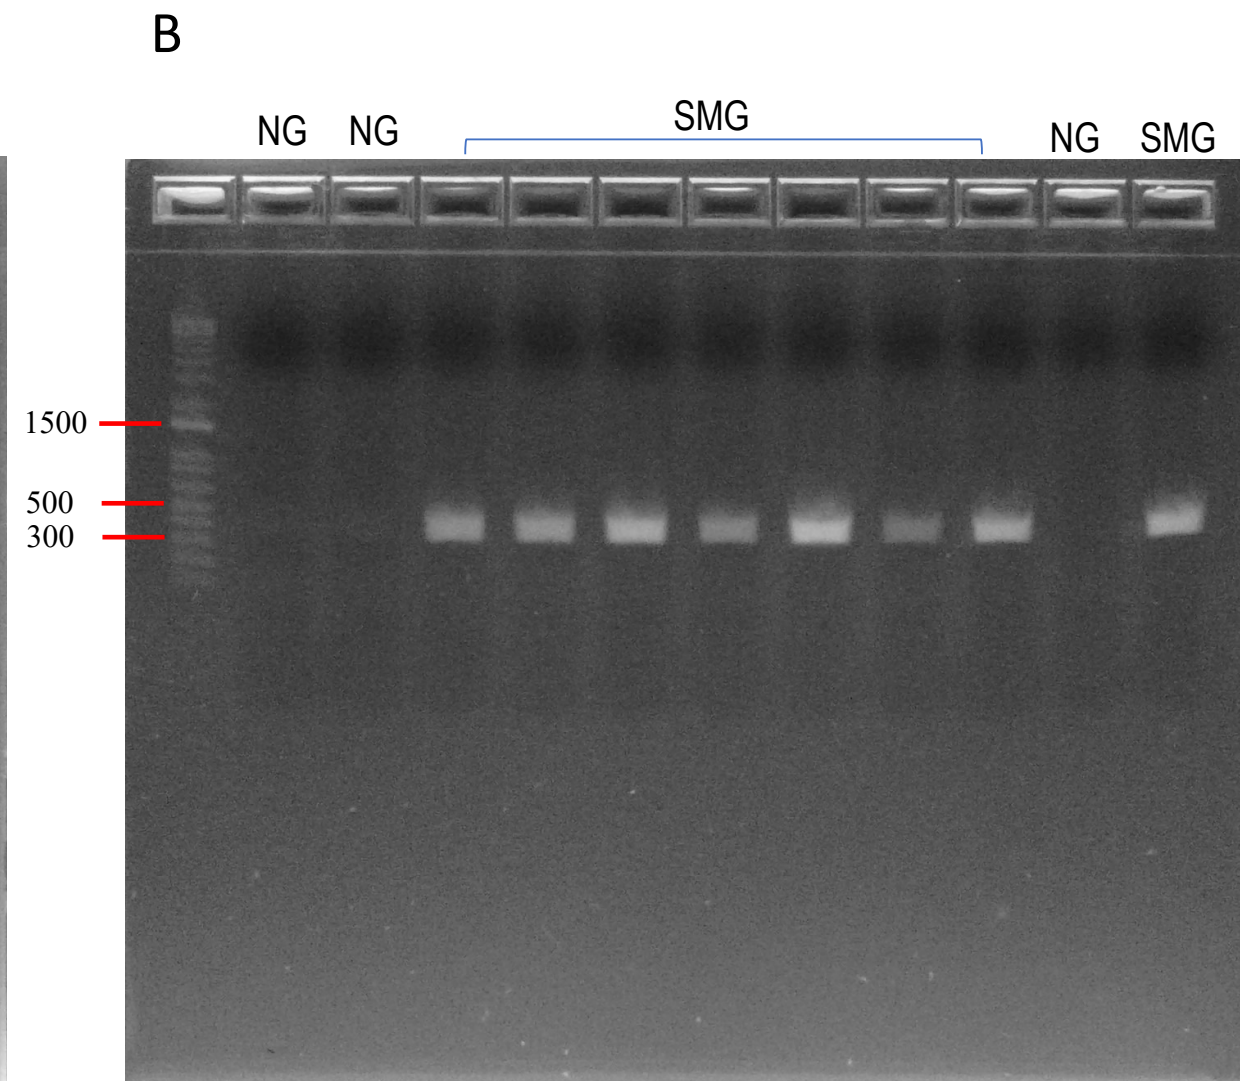

Isaba1

Fig. S2

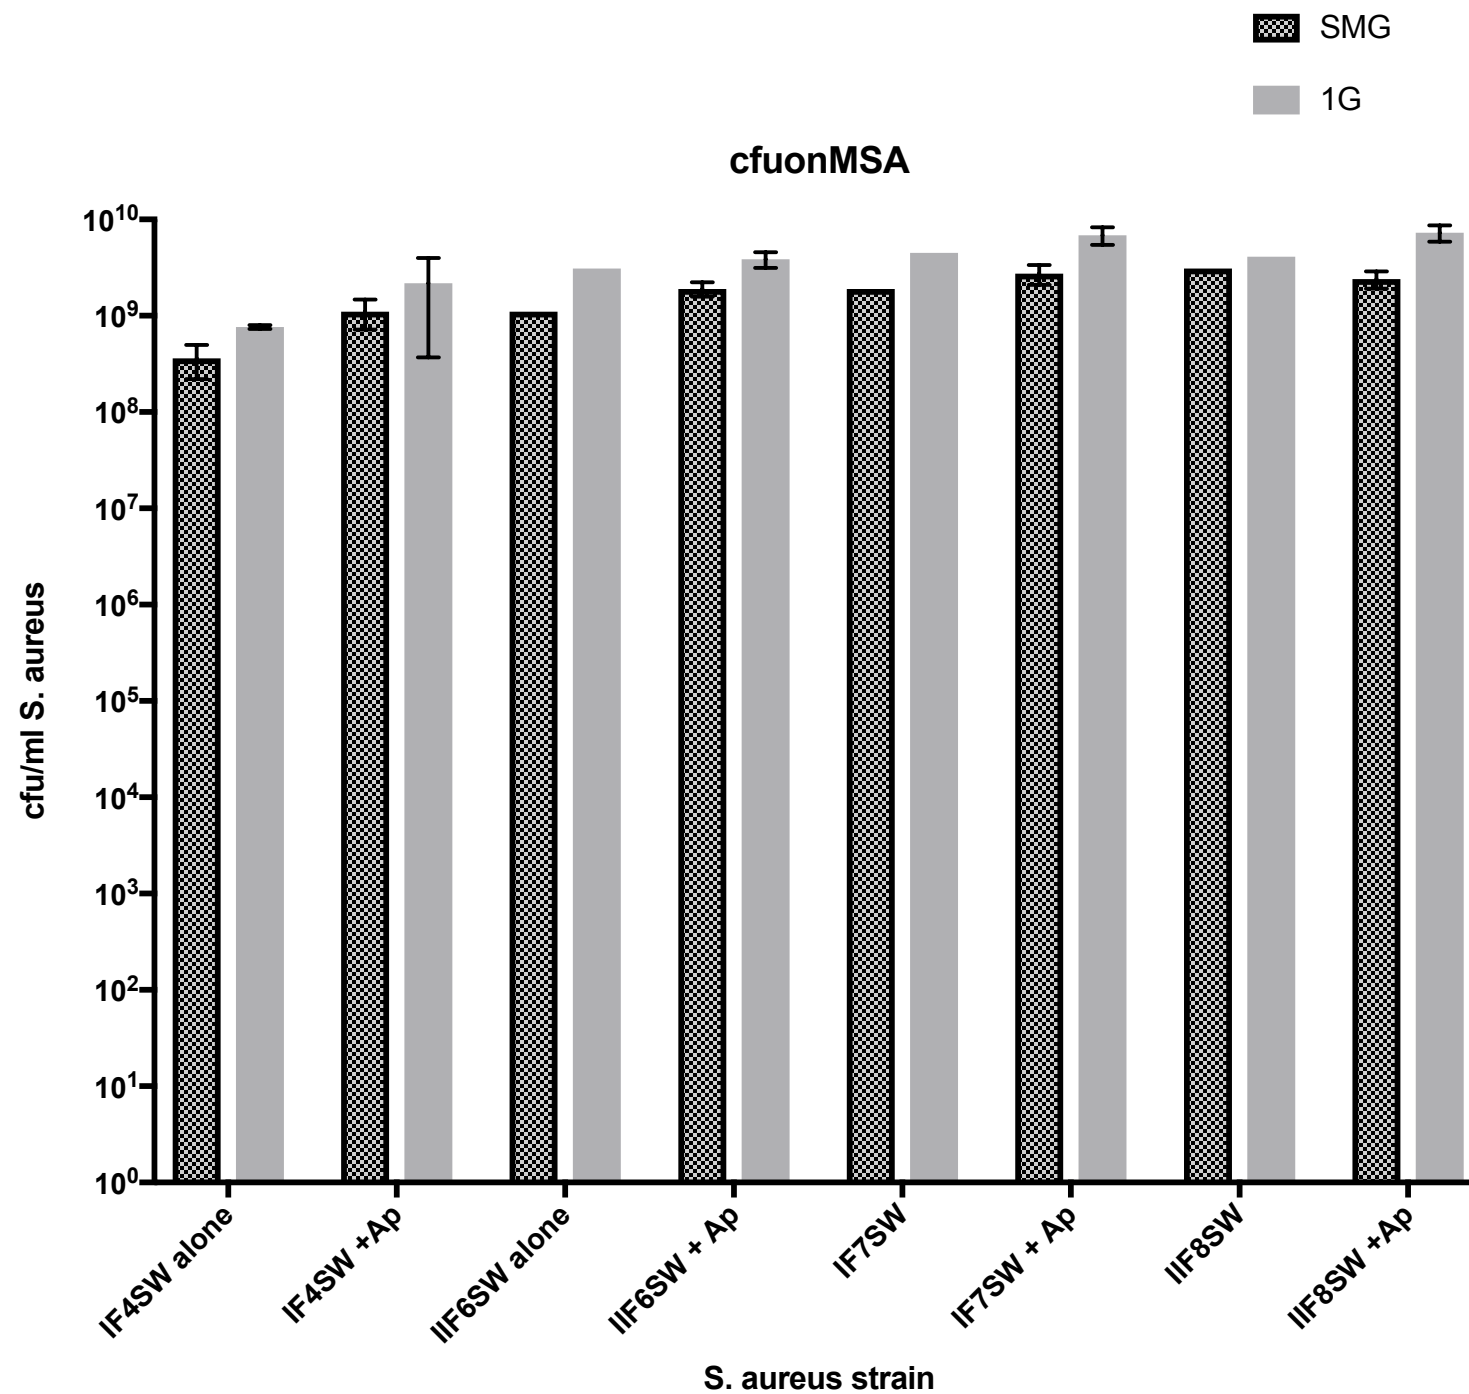

Genomic location on Acinetobacter pittii strain IIF1SW-P1

GenBank: MIZX01000006.1

Forward: 6387-6408

Reverse: 6958-6977

PCR product expected size: 591 bp

Sequence:

CCGAGTTGTTCCAATCCCTTATAAGCAATTTCTTTTCGAATAGAGCTAGGTATGCCTTTTTTTCATTTCTA  
AATTAAGTGAGAAAGCTATAATTTCTCCTTGTGGTTGAACGACCCAGCCTGTTAACCAGCCCCTTGAGG  
CTCCACATCCCATCCCCAACCACTTTTGGCATAAAATTTCCGTCCATTTTTTTCTTCTATGAACAGCATA  
GATTGAACTTGTTCTTGCATATTTTTGCTAAAAGGAAGAGTTTTATGGGCTAGTTCATAAGCAAACCTGGG  
CTTCTTGTTGAGGTGTAATTTTAAGTGGACCAACAAGCCAAAAATCATCTACTTTTGAACCAATATCAGC  
ATTACCGAAACCAATGCGTTTTACCTCTTTAGACATAAGATCAAGGCCAATTCGTCGAGCTAGTTCCTGA  
TAAACTGGAATAGCAGAAGCTTTCATCGCATCGCCTAATGTCATATCTTTTTCCCAATCGGGAAATAAAC  
GCTTTTGCCCATCCCATTTAAACACTTCAGTTGGTGTGCTTTATGATGCTCAAGTCCAATCAAAGCATT  
TAACATTTTAAAGGTAGAGGCGGGAACATAT

Primer Map:

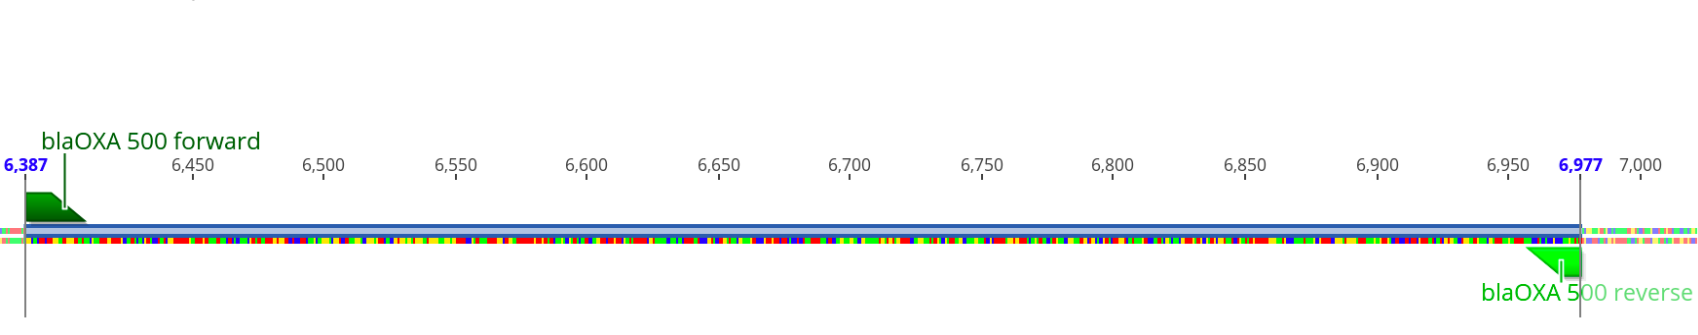

Scaffold 44  
GenBank: MIZX01000045.1

Forward: 4018-4037

Reverse: 4407-4388

PCR product expected size: 390 bp

Sequence:  
ATGCAGCGCTTCTTTGCAGGTCAGTATTTTGATTATCGTCAAATTTCTCAGTTGATTTTCAATATGTTTT  
CATTGACCAAGTGCAACTGACTTTAGATAGAACCAATTGGAAATGGGGAAAACGAAATATTAATATC  
CTGATGCTCGCAATCGTTTATCGTGGAATAGCGATACCTATCCTTTGGACATTGCTTAATAAACGTGGA  
AATTCAGATACGAAAGAGCGTATTGCTTTGATTCAACGCTTTATAGCCATTTTGGTAAAGACCGTATT  
GTGAATGTGTTTCGCAGACAGAGAGTTTATCGGTGAGCAGTGTTTACATGGTTAATTGAACAAGACAT  
CAACTTCTGCATTCTGTGTTAAAAAACTTCATTGTCACCAATCATT

Primer Map:

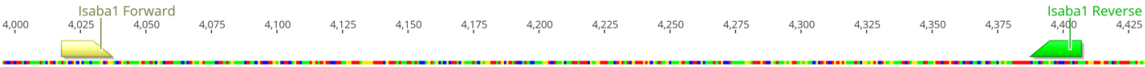

Scaffold 70  
GenBank: MIZX01000070.1

Forward: 932-913

Reverse: 543-562

PCR product expected size: 390 bp

Sequence:  
AATGATTGGTGACAATAAAGTTTTTTTAAACACGAATGCAGAAGTTGATGTCTTGTTCAATTAACCATGT  
AAACCACTGCTCACCGATAAACTCTCTGTCTGCGAACACATTACAATACGGTCTTTACCAAAAATGG  
AGATAAAGCGTTGAATCAAAGCAATACGCTCTTTTGTATCTGAATTTCCACGTTTATTAAGTAATGTCC  
AAACGATAGGTATCGCTATTCCACGATAAACGATCGCGAGCATCAGGATATTAATATTTTCGTTTTCCCC  
ATTTCCAATTGGTTCTATCTAAAGTCAGTTGCACTTTGTCTGAATGAAAATATATTGAAAATCAACTGAG  
AAATTTGACGATAATCGAAATACTGACCTGCAAAGAAGCGCTGCAT

Primer Map:

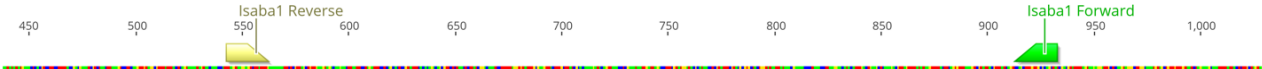

Supplement: s1 [file s1]
